# Supplementary material for: Understanding the role of hydrogen bonding in Brønsted acidic ionic liquid-catalyzed transesterification: a combined theoretical and experimental investigation
Source: Royal Society of Chemistry journal article supplement (doi:10.1039/c6cp06502c), 2016-01-01
Supplement: c6cp06502c1.pdf [file c6cp06502c1.pdf]

## Electronic Supplementary Information

### Understanding the role of hydrogen bonding in Brønsted acidic ionic liquid-catalyzed transesterification: A combined theoretical and experimental investigation

#### Supplementary Figures

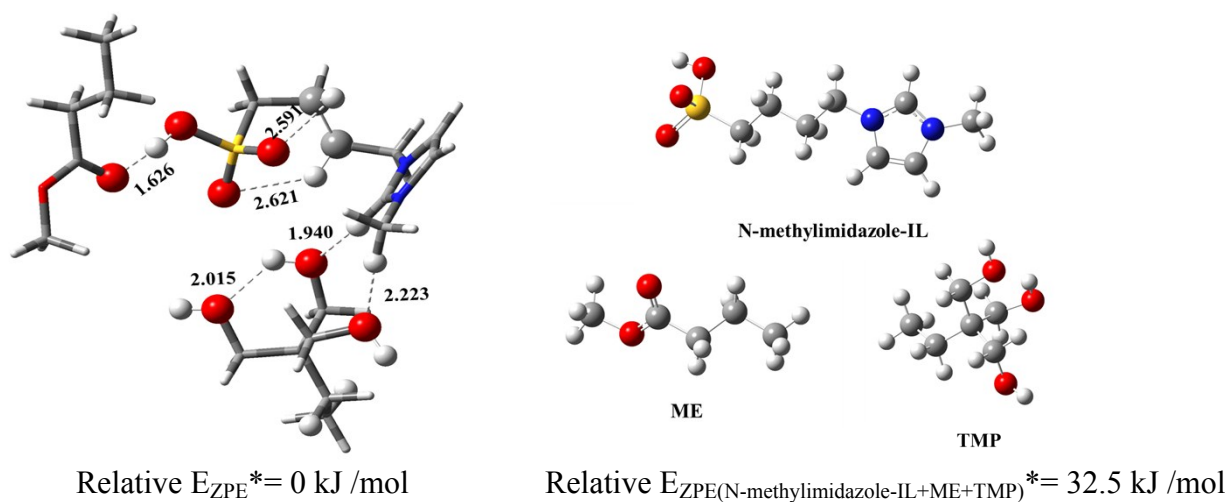

Fig. S1 The most stable geometries of the N-methylimidazole-IL/TMP/ME mixture with intra- and inter-molecular hydrogen bonds (a1) and without hydrogen bonds (a2)

It can be seen that the relative energy  $E_{ZPE}^*$  of geometry a2 was much higher, implying the significant contribution of HBs for stabilizing this system.

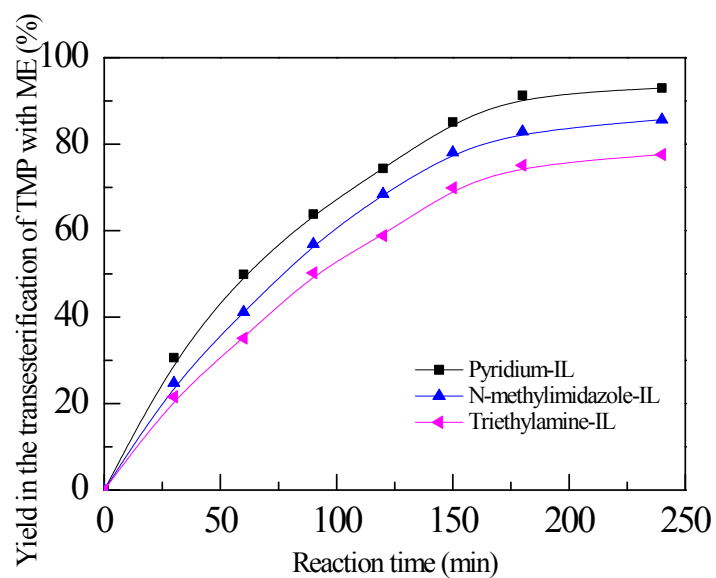

Fig. S2 Transesterification of TMP with ME catalyzed by these three ILs

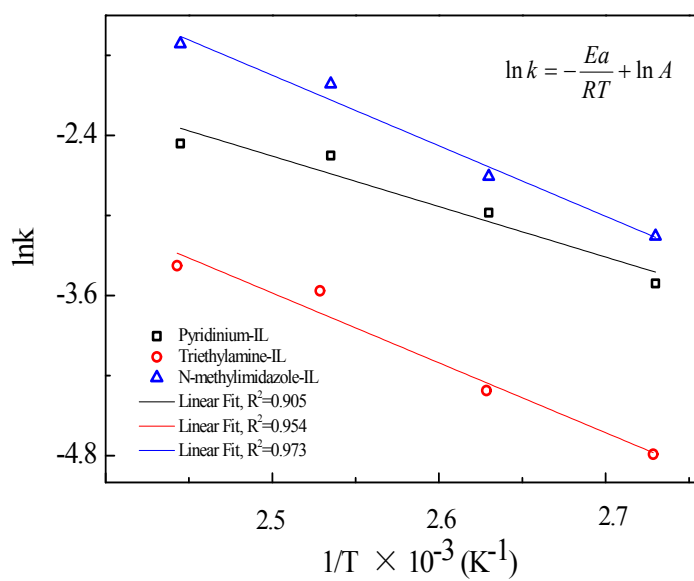

Fig. S3 Kinetics plot of  $\ln k$  vs.  $1/T$  for the triethylamine-IL catalyzed transesterification, the slope represents  $[-E_a/R]$  and the intercept represents  $\ln A$  respectively.

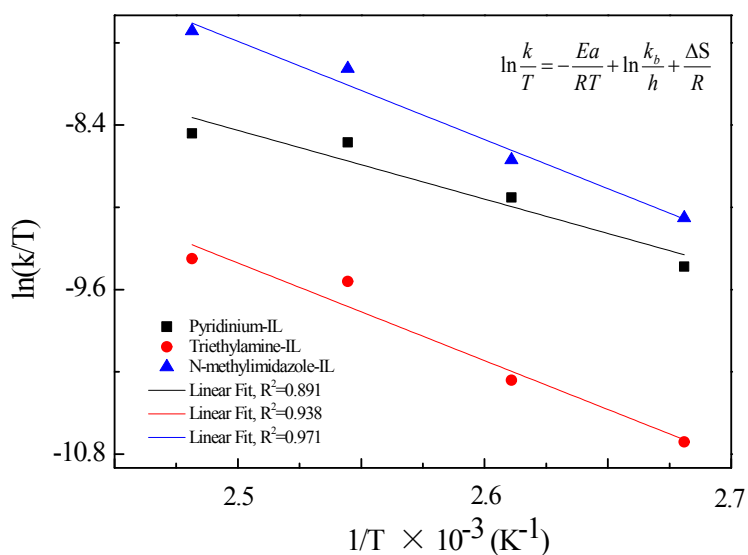

Fig. S4 Kinetics plot of  $\ln(k/T)$  vs.  $1/T$  for the triethylamine-IL catalyzed transesterification, the slope represents  $[-\Delta H/R]$  and the intercept represents  $[\ln(kB/h)+\Delta S/R]$  in the Eyring equation respectively.

## Supplementary Table

Table S1 Binding energies ( $\Delta E_{bin}$ ) and normalized delocalization energies ( $DE_{na}$ ) calculated for the three

BAIL-containing systems at the B3LYP/6-311++G level of theory <sup>a</sup>

| IL                   | $\Delta E_{bin}$ (kJ/mol) | $DE_{na}$ (kJ/mol) |
|----------------------|---------------------------|--------------------|
| pyridinium-IL        | 132.56                    | 80.2               |
| triethylamine-IL     | 130.45                    | 0                  |
| N-methylimidazole-IL | 152.16                    | 55.2               |

<sup>a</sup>The binding energies included BSSE and ZPVE corrections based on the results. The

normalized delocalization energies were calculated according to the methods proposed by Sabine et al<sup>[54]</sup>

Table S2 Comparison for the activation energy in the transesterification between DFT computed value and experiment result.

| IL                   | Activation Energy $\Delta E$ (kJ/mol) |                            |                                                     | Experiment result |
|----------------------|---------------------------------------|----------------------------|-----------------------------------------------------|-------------------|
|                      | DFT computed result                   | DFT with HSO <sup>4-</sup> | DFT with HSO <sup>4-</sup> under implicit solvation |                   |
| pyridinium-IL        | 199.6                                 | 157.3                      | 116.8                                               | 108.3             |
| triethylamine-IL     | 212.7                                 | 172.1                      | 126.5                                               | 113.3             |
| N-methylimidazole-IL | 201.2                                 | 162.5                      | 120.1                                               | 109.0             |
